# Supplementary material
Source: PubMed Central journal article supplement (PMC3406725)

# KEY AMINO ACID RESIDUES WITHIN THE THIRD MEMBRANE DOMAINS OF NR1 AND NR2 SUBUNITS CONTRIBUTE TO THE REGULATION OF THE SURFACE DELIVERY OF NMDA RECEPTORS

Kaniakova et al.

## SUPPLEMENTARY FIGURE LEGENDS

Fig. S1. ***Immunofluorescence microscopy showed that key amino acid residues within the NR2B M3 domain contribute to the regulation of the surface targeting of the full-length NR1-1a/NR2B receptors.*** COS-7 cells transfected with indicated cDNAs were surface stained with rabbit anti-GFP antibodies. A, Representative images of total (left panel) and surface (right panel) signals are shown. B, data represent mean  $\pm$  S.E. of the ratios of the fluorescence intensities per unit area obtained for surface and total GFP expression for each studied cell. More than 20 GFP-expressing cells for each combination of cDNAs were analyzed; \*\*,  $p < 0.001$ ,  $t$  test. The method was described previously (Horak et al., Journal of Neuroscience 28(13):3500-9, 2008). Images from stained cells were taken on an Olympus cell^R fluorescence microscope and analyzed using ImageJ software (NIH).

Fig. S2. ***Specific mutated NMDA receptors expressed in COS-7 cells exhibit functional properties similar to those of receptors expressed in HEK293 cells.*** Electrophysiological recordings were performed from COS-7 cells expressing the indicated NR1/NR2 receptors. Responses were elicited with 5 s applications of 1 mM glutamate (indicated by filled bar). Representative traces are shown. Please note that both mutated NMDA receptor subtypes exhibit functional properties similar to those obtained from the HEK293 cells (Fig. 2 and 3).

Fig. S3. ***Immunofluorescence microscopy showed that key amino acid residues within the NR1 M3 domain contribute to the regulation of the surface targeting of the full-length NMDA receptors.*** COS-7 cells transfected with indicated cDNAs were surface stained with rabbit anti-GFP antibodies. A, Representative images of total (left panel) and surface (right panel) signals are shown. B, data represent mean  $\pm$  S.E. of the ratios of the fluorescence intensities per unit area obtained for surface and total YFP expression for each studied cell. More than 20 YFP-expressing cells for each combination of cDNAs were analyzed; \*\*,  $p < 0.001$ ,  $t$  test. The method was described previously (Horak et al., Journal of Neuroscience 28(13):3500-9, 2008). Images from stained cells were taken on an Olympus cell^R fluorescence microscope and analyzed using ImageJ software (NIH). Interestingly, although the YFP-NR1-1a-T648A/NR2B receptors exhibited no obvious surface expression in the vast majority of cells, there was a minor population of cells with positive surface signal (data not shown).

Fig. S4. ***Key amino acid residues within the NR1 and NR2B M3 domains contribute to the regulation of the surface targeting of NR1/NR2B receptors expressed in HEK293 cells.*** HEK293 cells transfected with the indicated NMDA receptor subunits were labeled with anti-GFP antibodies using a quantitative colorimetric assay. Quantification of surface (black) and total (white) expression using quantitative colorimetric assay is shown. Plotted data represent mean  $\pm$  S.E.;  $n = 6$  in two experiments. \*\*,  $p < 0.001$  relative to control (YFP-NR1-1a/GFP-NR2B),  $t$  test.

Fig. S5. ***The distribution of indicated mutated NMDA receptors closely matches the distribution of an ER marker but not a GA marker.*** Images were taken on fixed COS-7 cells expressing indicated NMDA receptors using a confocal microscope. The labeling method is described in the Experimental Procedures.

Fig. S6. ***The expression of mutated NMDA receptors.*** A-B, COS-7 cells co-transfected with indicated NR1/NR2B subunits were solubilized with 1% DOC and probed with rabbit anti-GFP antibody. Please note that similar protein expression levels were observed for the wild type and mutated receptors ( $n=3$ ).

Figure S1

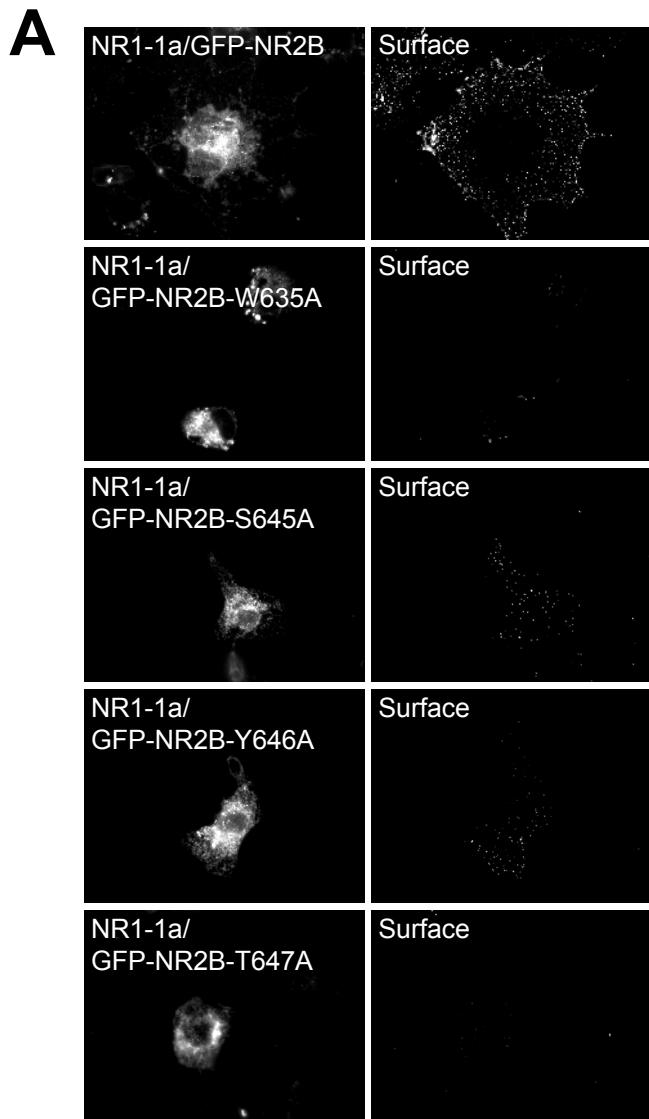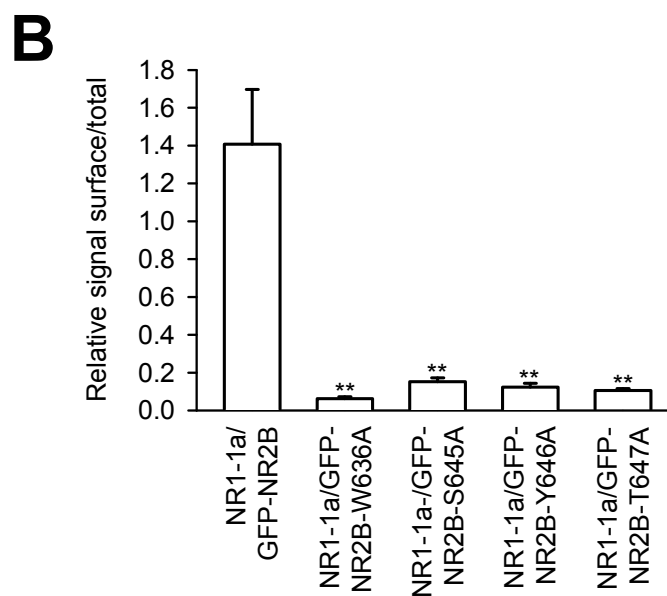

**Figure S2**

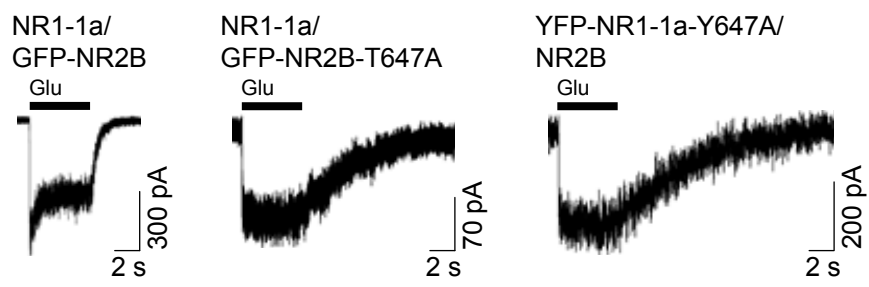

**Figure S3**

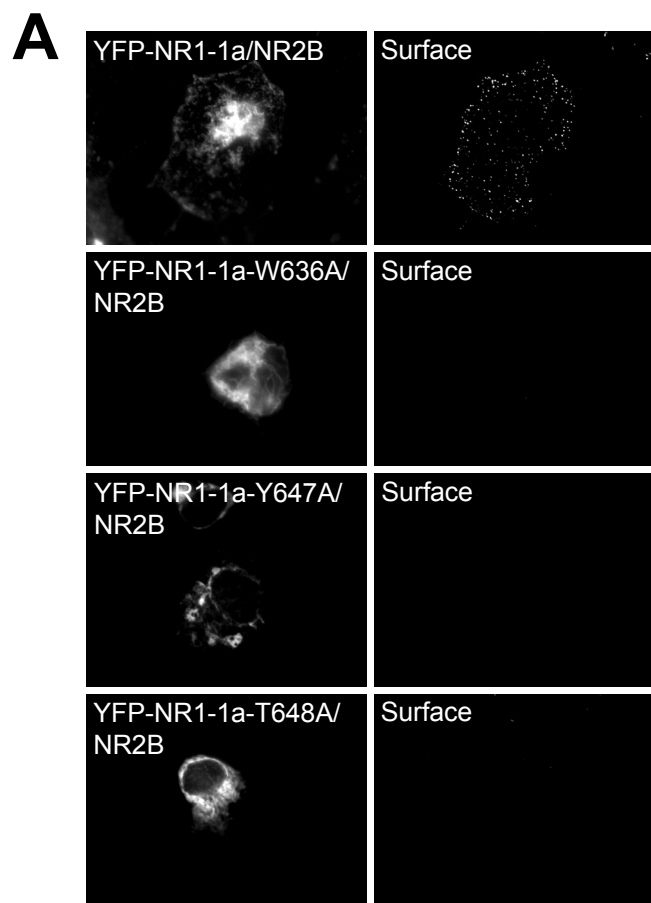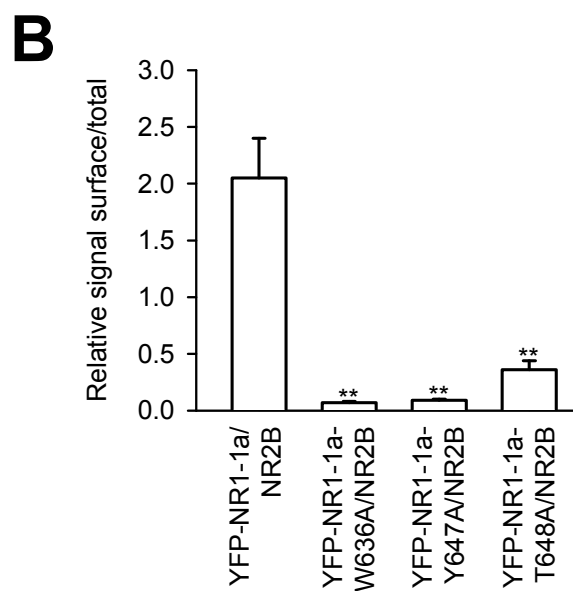

Figure S4

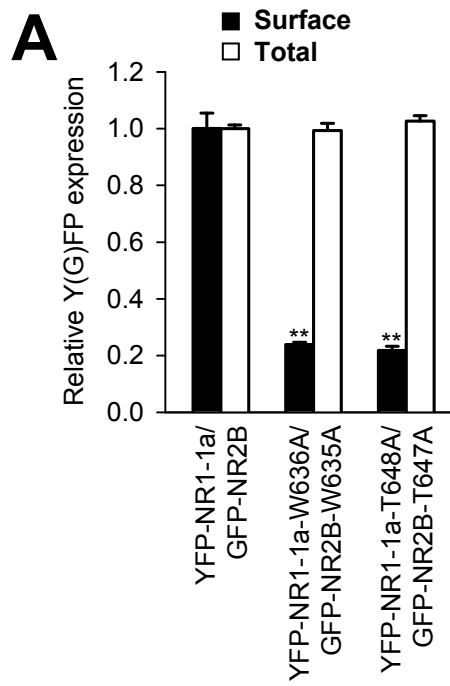

**Figure S5**

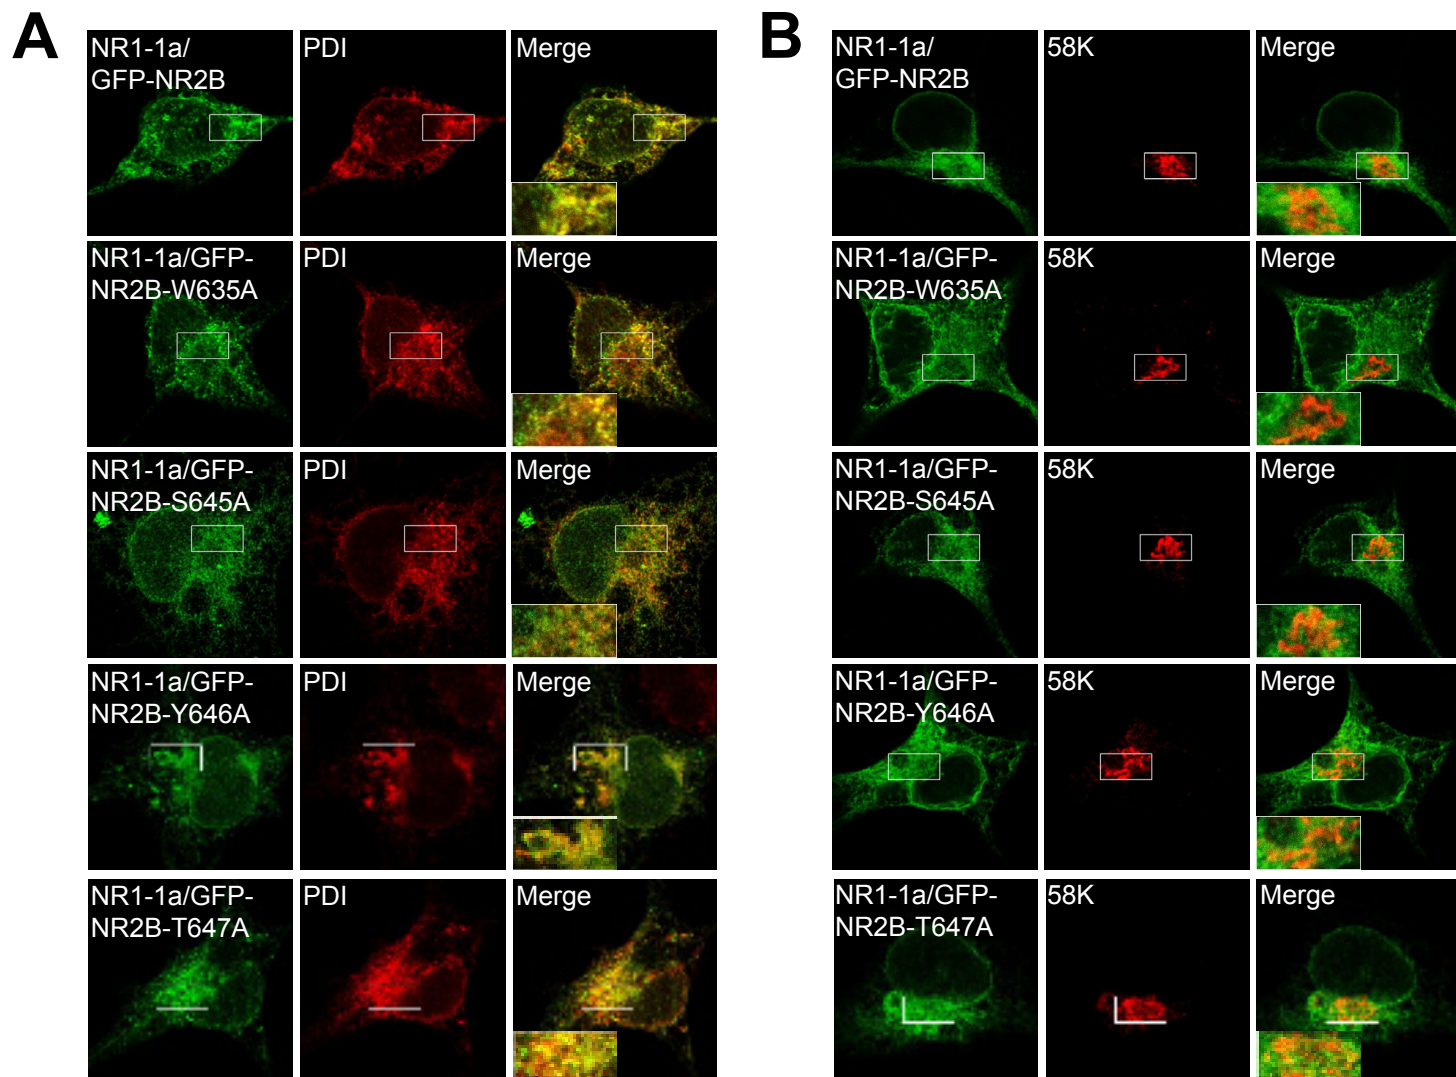

**Figure S6**

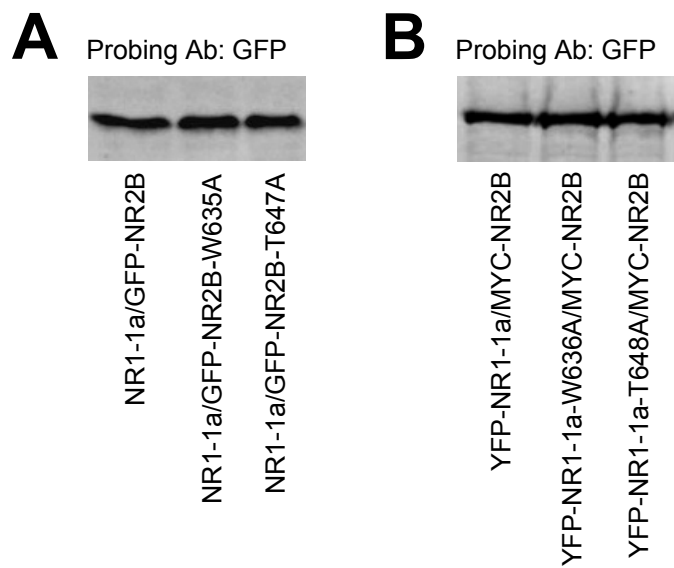

Supplement: supp_M112.339085_jbc.M112.339085-1.pdf [file supp_M112.339085_jbc.M112.339085-1.pdf]
